# Supplementary material
Source: HighWire-hosted journal article supplement (https://www.rcpjournals.org/highwire/filestream/13058/field_highwire_adjunct_files/3/Han_Supplementary_material_S4.pdf)
Supplement: Han_Supplementary_material_S4.pdf [file Han_Supplementary_material_S4.pdf]

**Supplementary Table S4.** Multivariable stepwise logistic regression to assess the risk of death within 30 days and six months of hospital discharge from conditions most commonly associated with frequent readmissions (see **Supplementary Table S3**).

|                                       | Risk of mortality |               |                 |                      |               |                 |
|---------------------------------------|-------------------|---------------|-----------------|----------------------|---------------|-----------------|
|                                       | Unadjusted        |               |                 | Age and sex adjusted |               |                 |
| <b>Died within 30 days</b>            | <b>OR</b>         | <b>95% CI</b> | <b><i>p</i></b> | <b>OR</b>            | <b>95% CI</b> | <b><i>p</i></b> |
| Congestive heart failure              | 5.94              | 4.22-8.38     | <0.001          | 3.00                 | 2.11-4.25     | <0.001          |
| Chronic obstructive pulmonary disease | 4.63              | 3.25-6.58     | <0.001          | 3.27                 | 2.29-4.68     | <0.001          |
| Pneumonia                             | 4.57              | 3.73-5.59     | <0.001          | 2.67                 | 2.17-3.29     | <0.001          |
| Sepsis                                | 3.39              | 2.60-4.41     | <0.001          | 3.05                 | 2.33-4.00     | <0.001          |
| Endocrine disorders                   | 1.86              | 1.31-2.64     | <0.001          | 2.33                 | 1.63-3.33     | <0.001          |
| Urinary tract infection               | 2.62              | 1.94-3.53     | <0.001          | 1.39                 | 1.02-1.88     | 0.034           |
| Psychiatric disorders                 | 2.51              | 1.40-4.50     | 0.002           | 2.25                 | 1.24-4.10     | <0.001          |
| Haematological disorders              | 1.70              | 1.08-2.68     | 0.022           | 1.87                 | 1.18-2.97     | 0.008           |
| <b>Died within 6 months</b>           | <b>OR</b>         | <b>95% CI</b> | <b><i>p</i></b> | <b>OR</b>            | <b>95% CI</b> | <b><i>p</i></b> |
| Congestive heart failure              | 5.91              | 4.67-7.48     | <0.001          | 3.01                 | 2.35-3.84     | <0.001          |
| Chronic obstructive pulmonary disease | 4.20              | 3.30-5.35     | <0.001          | 2.99                 | 2.33-3.84     | <0.001          |
| Pneumonia                             | 4.18              | 3.65-4.79     | <0.001          | 2.49                 | 2.16-2.86     | <0.001          |
| Sepsis                                | 2.84              | 2.38-3.40     | <0.001          | 2.66                 | 2.20-3.21     | <0.001          |
| Endocrine disorders                   | 1.56              | 1.25-1.99     | <0.001          | 2.05                 | 1.61-2.61     | <0.001          |
| Urinary tract infection               | 2.77              | 2.31-3.34     | <0.001          | 1.49                 | 1.21-1.77     | <0.001          |
| Haematological disorders              | 1.45              | 1.08-1.96     | 0.014           | 1.63                 | 1.20-2.23     | 0.002           |
